# Supplementary material for: CGRP Administration Into the Cerebellum Evokes Light Aversion, Tactile Hypersensitivity, and Nociceptive Squint in Mice
Source: PubMed Central journal article supplement (PMC9082264; doi:10.3389/fpain.2022.861598), 2022-04-25
Supplement: Data_Sheet_1.pdf [file Data_Sheet_1.pdf]

## Supplementary Material

### 1.1 Supplementary Figures

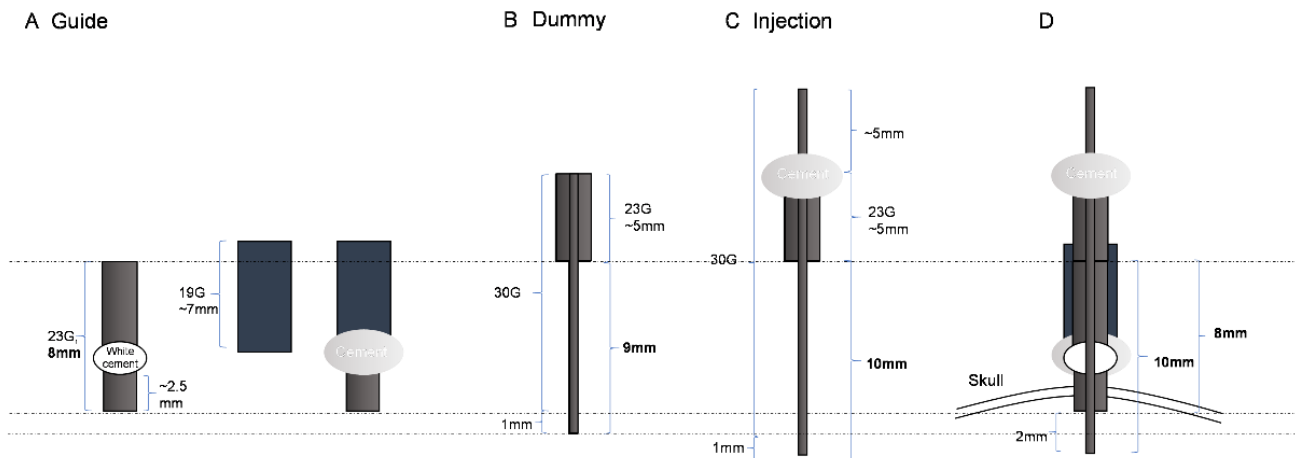

**Supplementary Fig. 1 Cannula design and assembly diagram.** (A) Guide cannulas. The guide cannula was made from an 8-mm, 23-gauge needle (left) with the ventral portion covered by a ~7-mm, 19-gauge tubing (middle), which were adhered by adhesive and dental cement (right). The plastic holder was removed from 23-gauge needle without removing the original white cement (left). The ~7-mm, 19-gauge tubing is ~2 mm higher than the 23-gauge needle to shield the junction between guide's top and the dummy or injection cannula after their insertion, allowing the dummy or the injection cannula to stay in position after insertion (right). (B) Dummy cannulas. The dummy cannula, used to seal and keep the guide cannula free of clogs, was made by crimping a short segment of ~5-mm, 23-gauge tubing to a ~14 mm piece of 30-gauge tubing. The bottom of the 30-gauge tubing was cut to ensure that the 30-gauge segment below the ~5-mm, 23-gauge segment is 9 mm. (C) Injection cannulas. The injection cannula was made by adhering a short segment of ~5-mm, 23-gauge tubing ~5 mm below the top of a ~20-mm piece of 30-gauge tubing with adhesive and dental cement. The bottom of the 30-gauge tubing was cut to ensure that the 30-gauge segment below the ~5-mm, 23-gauge segment is 10 mm. (D) The injection cannula extended 2 mm beyond the base of the guide cannula when was inserted into the guide cannula.

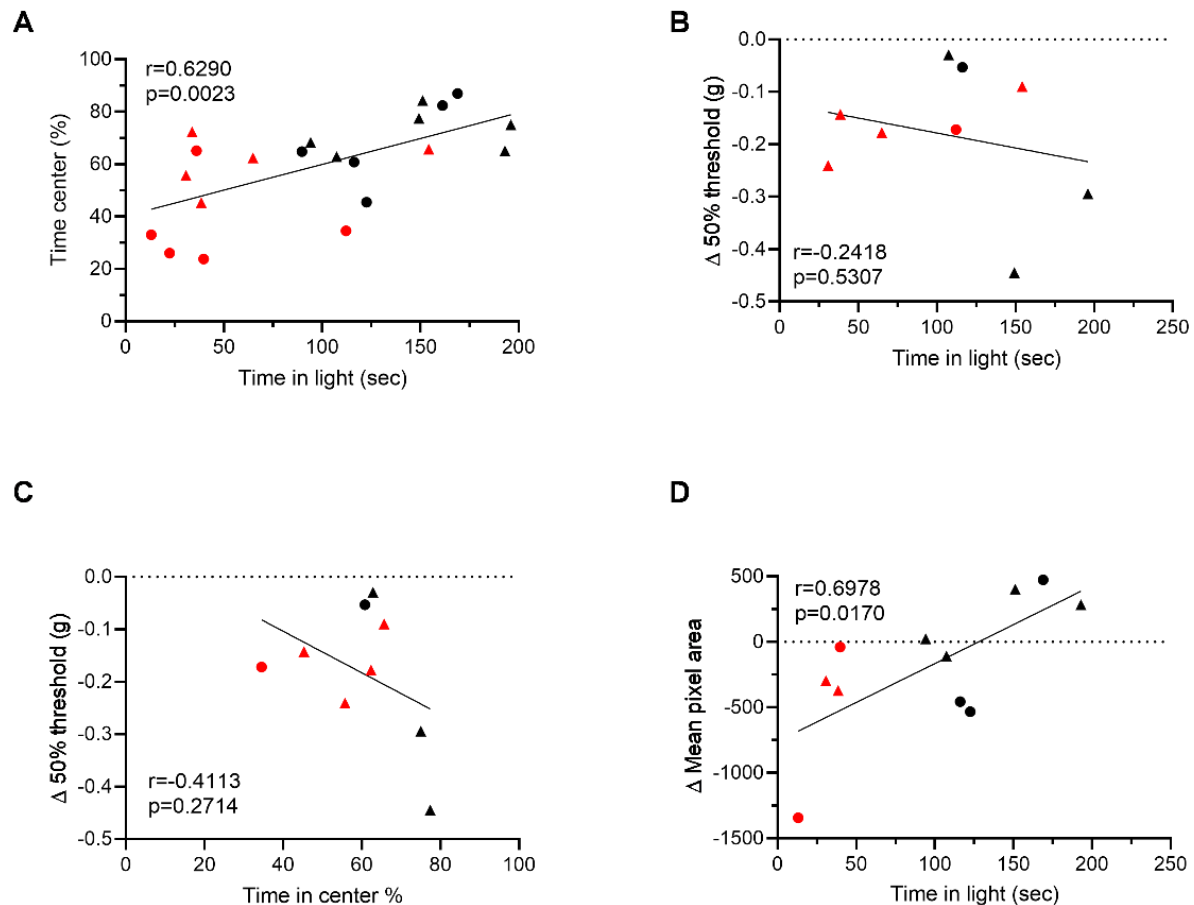

**Supplementary Fig. 2 Correlation of behavioral outputs.** (A) Correlation between time in light and time in center. PBS (n=11) or CGRP (n=10). (B) Correlation between time in light and changes in the left paw withdrawal threshold. PBS (n=4) or CGRP (n=5). (C) Correlation between time in center and changes in the left paw withdrawal threshold. PBS (n=4) or CGRP (n=5). (D) Correlation between time in light and changes in mean pixel area. PBS (n=7) or CGRP (n=4). Black circle (●) represents PBS-treated female mice; black triangle (▲) represents PBS-treated male mice; red circle (●) represents CGRP-treated female mice; red triangle (▲) represents CGRP-treated male mice. Statistics are described in Supplementary Table 1.

## Supplementary Table 1 Statistical analyses

| Figure no.                              | Analysis                                                | Statistics (symbol on Figure)      |
|-----------------------------------------|---------------------------------------------------------|------------------------------------|
| Fig. 1A left (all mice)                 | Two-way repeated measure ANOVA                          |                                    |
|                                         | Interaction factor                                      | F (5, 95) = 1.734, P=0.1343        |
|                                         | Treatment factor                                        | F (1, 19) = 23.23, P=0.0001        |
|                                         | Time factor                                             | F (2.677, 50.86) = 6.280, P=0.0015 |
| Fig. 1A middle (females)                | Two-way repeated measure ANOVA                          |                                    |
|                                         | Interaction factor                                      | F (5, 40) = 0.7746, P=0.5738       |
|                                         | Treatment factor                                        | F (1, 8) = 14.45, P=0.0052         |
|                                         | Time factor                                             | F (2.675, 21.40) = 9.368, P=0.0005 |
| Fig. 1A right (males)                   | Two-way repeated measure ANOVA                          |                                    |
|                                         | Interaction factor                                      | F (5, 45) = 1.074, P=0.3877        |
|                                         | Treatment factor                                        | F (1, 9) = 8.808, P=0.0158         |
|                                         | Time factor                                             | F (2.076, 18.68) = 1.891, P=0.1777 |
| Fig. 1B left (all mice)                 | Unpaired 2-tailed t-test                                | t=4.820, df=19, P=0.0001           |
| Fig. 1B middle (females)                | Unpaired 2-tailed t-test                                | t=3.802, df=8, P=0.0052            |
| Fig. 1B right (males)                   | Unpaired 2-tailed t-test                                | t=2.968, df=9, P=0.0158            |
| Fig. 1B<br>Female CGRP vs.<br>Male CGRP | Unpaired 2-tailed t-test                                | t=0.6791, df=8, P=0.5163           |
| Fig. 2A upper panel                     |                                                         |                                    |
| Left (all mice)                         | Two-way repeated measure ANOVA (mixed effects analysis) |                                    |
|                                         | Interaction factor                                      | F (5, 84) = 0.7322, P=0.6013       |
|                                         | Treatment factor                                        | F (1, 19) = 0.01297, P=0.9105      |
|                                         | Time factor                                             | F (2.807, 47.16) = 8.859, P=0.0001 |
| Middle (females)                        | Two-way repeated measure ANOVA (mixed effects analysis) |                                    |
|                                         | Interaction factor                                      | F (5, 36) = 0.4571, P=0.8053       |
|                                         | Treatment factor                                        | F (1, 8) = 0.6466, P=0.4446        |
|                                         | Time factor                                             | F (1.952, 14.05) = 7.334, P=0.0068 |
| Right (males)                           | Two-way repeated measure ANOVA (mixed effects analysis) |                                    |
|                                         | Interaction factor                                      | F (5, 38) = 1.570, P=0.1918        |
|                                         | Treatment factor                                        | F (1, 9) = 0.7938, P=0.3961        |
|                                         | Time factor                                             | F (1.714, 13.03) = 6.755, P=0.0119 |
| Fig. 2A lower panel                     |                                                         |                                    |
| Left (all mice)                         | Two-way repeated measure ANOVA                          |                                    |
|                                         | Interaction factor                                      | F (5, 95) = 2.995, P=0.0148        |
|                                         | Treatment factor                                        | F (1, 19) = 28.00, P<0.0001        |
|                                         | Time factor                                             | F (3.220, 61.18) = 41.21, P<0.0001 |
|                                         | Šídák's multiple comparisons test                       | *P < .05, **P < .01, ***P < .001   |
| Middle (females)                        | Two-way repeated measure ANOVA                          |                                    |
|                                         | Interaction factor                                      | F (5, 40) = 4.713, P=0.0018        |
|                                         | Treatment factor                                        | F (1, 8) = 17.02, P=0.0033         |
|                                         | Time factor                                             | F (2.779, 22.23) = 31.66, P<0.0001 |
|                                         | Šídák's multiple comparisons test                       | *P < .05, **P < .01                |
| Right (males)                           | Two-way repeated measure ANOVA                          |                                    |
|                                         | Interaction factor                                      | F (5, 45) = 0.6068, P=0.6950       |
|                                         | Treatment factor                                        | F (1, 9) = 10.24, P=0.0108         |
|                                         | Time factor                                             | F (2.691, 24.22) = 15.43, P<0.0001 |
| Fig. 2B upper panel                     |                                                         |                                    |
| Left (all mice)                         | Unpaired 2-tailed t-test                                | t=0.06504, df=19, P=0.9488         |
| Middle (females)                        | Unpaired 2-tailed t-test                                | t=0.9003, df=8, P=0.3942           |
| Right (males)                           | Unpaired 2-tailed t-test                                | t=0.7370, df=9, P=0.4799           |
| Fig. 2B lower panel                     |                                                         |                                    |
| Left (all mice)                         | Unpaired 2-tailed t-test                                | t=5.291, df=19, P<0.0001           |
| Middle (females)                        | Unpaired 2-tailed t-test                                | t=4.125, df=8, P=0.0033            |
| Right (males)                           | Unpaired 2-tailed t-test                                | t=3.200, df=9, P=0.0108            |

|                     |                                                         |                                     |                               |                               |
|---------------------|---------------------------------------------------------|-------------------------------------|-------------------------------|-------------------------------|
| Fig. 2C upper panel |                                                         |                                     |                               |                               |
| Left (all mice)     | Two-way repeated measure ANOVA (mixed effects analysis) |                                     |                               |                               |
|                     | Interaction factor                                      | F (5, 84) = 1.411, P=0.2288         |                               |                               |
|                     | Treatment factor                                        | F (1, 19) = 4.694, P=0.0432         |                               |                               |
|                     | Time factor                                             | F (2.759, 46.35) = 0.5223, P=0.6542 |                               |                               |
| Middle (females)    | Two-way repeated measure ANOVA (mixed effects analysis) |                                     |                               |                               |
|                     | Interaction factor                                      | F (5, 36) = 2.016, P=0.0997         |                               |                               |
|                     | Treatment factor                                        | F (1, 8) = 3.530, P=0.0971          |                               |                               |
|                     | Time factor                                             | F (1.482, 10.67) = 0.1453, P=0.8048 |                               |                               |
| Right (males)       | Two-way repeated measure ANOVA (mixed effects analysis) |                                     |                               |                               |
|                     | Interaction factor                                      | F (5, 38) = 0.9688, P=0.4491        |                               |                               |
|                     | Treatment factor                                        | F (1, 9) = 1.575, P=0.2411          |                               |                               |
|                     | Time factor                                             | F (1.905, 14.48) = 0.9849, P=0.3933 |                               |                               |
| Fig. 2C lower panel |                                                         |                                     |                               |                               |
| Left (all mice)     | Two-way repeated measure ANOVA                          |                                     |                               |                               |
|                     | Interaction factor                                      | F (5, 95) = 1.020, P=0.4104         |                               |                               |
|                     | Treatment factor                                        | F (1, 19) = 4.554, P=0.0461         |                               |                               |
|                     | Time factor                                             | F (1.690, 32.10) = 5.394, P=0.0129  |                               |                               |
| Middle (females)    | Two-way repeated measure ANOVA                          |                                     |                               |                               |
|                     | Interaction factor                                      | F (5, 40) = 2.197, P=0.0737         |                               |                               |
|                     | Treatment factor                                        | F (1, 8) = 3.328, P=0.1055          |                               |                               |
|                     | Time factor                                             | F (1.459, 11.67) = 4.477, P=0.0453  |                               |                               |
| Right (males)       | Two-way repeated measure ANOVA                          |                                     |                               |                               |
|                     | Interaction factor                                      | F (5, 45) = 0.4386, P=0.8192        |                               |                               |
|                     | Treatment factor                                        | F (1, 9) = 1.189, P=0.3039          |                               |                               |
|                     | Time factor                                             | F (2.333, 20.99) = 2.168, P=0.1332  |                               |                               |
| Fig. 2D upper panel |                                                         |                                     |                               |                               |
| Left (all mice)     | Unpaired 2-tailed t-test                                | t=2.300, df=19, P=0.0330            |                               |                               |
| Middle (females)    | Unpaired 2-tailed t-test                                | t=1.979, df=8, P=0.0831             |                               |                               |
| Right (males)       | Unpaired 2-tailed t-test                                | t=1.321, df=9, P=0.2192             |                               |                               |
| Fig. 2D lower panel |                                                         |                                     |                               |                               |
| Left (all mice)     | Unpaired 2-tailed t-test                                | t=2.131, df=19, P=0.0464            |                               |                               |
| Middle (females)    | Unpaired 2-tailed t-test                                | t=1.854, df=8, P=0.1008             |                               |                               |
| Right (males)       | Unpaired 2-tailed t-test                                | t=1.084, df=9, P=0.3066             |                               |                               |
| Fig. 2E             |                                                         |                                     |                               |                               |
| Left (all mice)     | Two-way repeated measure ANOVA                          |                                     |                               |                               |
|                     | Interaction factor                                      | F (5, 95) = 2.190, P=0.0617         |                               |                               |
|                     | Treatment factor                                        | F (1, 19) = 19.19, P=0.0003         |                               |                               |
|                     | Time factor                                             | F (3.507, 66.63) = 7.639, P<0.0001  |                               |                               |
| Middle (females)    | Two-way repeated measure ANOVA                          |                                     |                               |                               |
|                     | Interaction factor                                      | F (5, 40) = 2.181, P=0.0755         |                               |                               |
|                     | Treatment factor                                        | F (1, 8) = 10.05, P=0.0132          |                               |                               |
|                     | Time factor                                             | F (2.947, 23.58) = 4.349, P=0.0145  |                               |                               |
| Right (males)       | Two-way repeated measure ANOVA                          |                                     |                               |                               |
|                     | Interaction factor                                      | F (5, 45) = 0.6413, P=0.6694        |                               |                               |
|                     | Treatment factor                                        | F (1, 9) = 8.275, P=0.0183          |                               |                               |
|                     | Time factor                                             | F (2.478, 22.31) = 3.553, P=0.0375  |                               |                               |
| Fig. 2F             |                                                         |                                     |                               |                               |
| Left (all mice)     | Unpaired 2-tailed t-test                                | t=4.380, df=19, P=0.0003            |                               |                               |
| Middle (females)    | Unpaired 2-tailed t-test                                | t=3.170, df=8, P=0.0132             |                               |                               |
| Right (males)       | Unpaired 2-tailed t-test                                | t=2.877, df=9, P=0.0183             |                               |                               |
|                     |                                                         | LF                                  | RF                            | LH                            |
| Fig. 3A (all mice)  | Two-way repeated measure ANOVA                          |                                     |                               |                               |
|                     | Interaction factor                                      | F (1, 24) = 0.6154, P=0.4404        | F (1, 24) = 0.01717, P=0.8968 | F (1, 24) = 0.08938, P=0.7675 |
|                     | Treatment factor                                        | F (1, 24) = 5.359, P=0.0295         | F (1, 24) = 4.852, P=0.0375   | F (1, 24) = 4.018, P=0.0564   |
|                     | Condition factor                                        | F (1, 24) = 0.0006404, P=0.9800     | F (1, 24) = 0.06471, P=0.8014 | F (1, 24) = 1.430, P=0.2434   |
|                     |                                                         |                                     |                               | F (1, 24) = 0.02838, P=0.8676 |
|                     |                                                         |                                     |                               | F (1, 24) = 6.202, P=0.0201   |
|                     |                                                         |                                     |                               | F (1, 24) = 1.882, P=0.1828   |
| Fig. 3B (all mice)  | Two-way repeated measure ANOVA                          |                                     |                               |                               |

|                                         |                                   |                                    |                                     |                                  |                                 |
|-----------------------------------------|-----------------------------------|------------------------------------|-------------------------------------|----------------------------------|---------------------------------|
|                                         | Interaction factor                | F (1, 24) = 0.5979, P=0.4469       | F (1, 24) = 2.546e-029,<br>P>0.9999 | F (1, 24) = 1.158, P=0.2926      | F (1, 24) = 1.026, P=0.3213     |
|                                         | Treatment factor                  | F (1, 26) = 5.467, P=0.0280        | F (1, 24) = 5.044, P=0.0342         | F (1, 24) = 4.075, P=0.0548      | F (1, 24) = 5.840, P=0.0236     |
|                                         | Condition factor                  | F (1, 24) = 1.227, P=0.2790        | F (1, 24) = 1.748, P=0.1986         | F (1, 24) = 3.624, P=0.0690      | F (1, 24) = 2.849, P=0.1044     |
| Fig. 3C (females)                       | Two-way repeated measure ANOVA    |                                    |                                     |                                  |                                 |
|                                         | Interaction factor                | F (1, 13) = 0.04835, P=0.8294      | F (1, 13) = 0.1587,<br>P=0.6969     | F (1, 13) = 0.04021,<br>P=0.8442 | F (1, 13) = 1.409, P=0.2565     |
|                                         | Treatment factor                  | F (1, 13) = 6.555, P=0.0237        | F (1, 13) = 6.113, P=0.0280         | F (1, 13) = 6.307, P=0.0260      | F (1, 13) = 7.275, P=0.0183     |
|                                         | Condition factor                  | F (1, 13) = 0.1194, P=0.7352       | F (1, 13) = 0.05712,<br>P=0.8148    | F (1, 13) = 0.3619,<br>P=0.5578  | F (1, 13) = 0.8653,<br>P=0.3692 |
| Fig. 3D (females)                       | Two-way repeated measure ANOVA    |                                    |                                     |                                  |                                 |
|                                         | Interaction factor                | F (1, 13) = 0.04216, P=0.8405      | F (1, 13) = 0.05000,<br>P=0.8265    | F (1, 13) = 0.7695,<br>P=0.3963  | F (1, 13) = 3.145, P=0.0996     |
|                                         | Treatment factor                  | F (1, 13) = 5.438, P=0.0364        | F (1, 13) = 7.020, P=0.0200         | F (1, 13) = 7.021, P=0.0200      | F (1, 13) = 6.418, P=0.0250     |
|                                         | Condition factor                  | F (1, 13) = 0.3795, P=0.5485       | F (1, 13) = 0.2000,<br>P=0.6621     | F (1, 13) = 1.316, P=0.2720      | F (1, 13) = 1.132, P=0.3067     |
| Fig. 3E (males)                         | Two-way repeated measure ANOVA    |                                    |                                     |                                  |                                 |
|                                         | Interaction factor                | F (1, 9) = 0.6454, P=0.4425        | F (1, 9) = 0.3455, P=0.5711         | F (1, 9) = 0.03195,<br>P=0.8621  | F (1, 9) = 0.5894, P=0.4623     |
|                                         | Treatment factor                  | F (1, 9) = 0.3741, P=0.5559        | F (1, 9) = 0.2286, P=0.6439         | F (1, 9) = 0.06064,<br>P=0.8110  | F (1, 9) = 0.5216, P=0.4885     |
|                                         | Condition factor                  | F (1, 9) = 0.06262, P=0.8080       | F (1, 9) = 0.3455, P=0.5711         | F (1, 9) = 1.026, P=0.3376       | F (1, 9) = 0.8910, P=0.3698     |
| Fig. 3F (males)                         | Two-way repeated measure ANOVA    |                                    |                                     |                                  |                                 |
|                                         | Interaction factor                | F (1, 9) = 0.8070, P=0.3924        | F (1, 9) = 0.04120,<br>P=0.8437     | F (1, 9) = 0.3445, P=0.5717      | F (1, 9) = 0.1848, P=0.6774     |
|                                         | Treatment factor                  | F (1, 9) = 0.6519, P=0.4403        | F (1, 9) = 0.1070, P=0.7511         | F (1, 9) = 0.007599,<br>P=0.9324 | F (1, 9) = 0.5434, P=0.4798     |
|                                         | Condition factor                  | F (1, 9) = 0.8070, P=0.3924        | F (1, 9) = 2.019, P=0.1891          | F (1, 9) = 2.153, P=0.1763       | F (1, 9) = 1.663, P=0.2294      |
| Fig. 4A left (all mice)                 | Two-way repeated measure ANOVA    |                                    |                                     |                                  |                                 |
|                                         | Interaction factor                | F (5, 100) = 5.414, P=0.0002       |                                     |                                  |                                 |
|                                         | Treatment factor                  | F (1, 20) = 9.155, P=0.0067        |                                     |                                  |                                 |
|                                         | Time factor                       | F (3.129, 62.59) = 9.223, P<0.0001 |                                     |                                  |                                 |
|                                         | Šidák's multiple comparisons test | *P < .05, **P < .01                |                                     |                                  |                                 |
| Fig. 4A middle (females)                | Two-way repeated measure ANOVA    |                                    |                                     |                                  |                                 |
|                                         | Interaction factor                | F (5, 40) = 1.270, P=0.2960        |                                     |                                  |                                 |
|                                         | Treatment factor                  | F (1, 8) = 8.899, P=0.0175         |                                     |                                  |                                 |
|                                         | Time factor                       | F (3.397, 27.17) = 3.397, P=0.0276 |                                     |                                  |                                 |
| Fig. 4A right (males)                   | Two-way repeated measure ANOVA    |                                    |                                     |                                  |                                 |
|                                         | Interaction factor                | F (5, 50) = 4.846, P=0.0011        |                                     |                                  |                                 |
|                                         | Treatment factor                  | F (1, 10) = 4.013, P=0.0730        |                                     |                                  |                                 |
|                                         | Time factor                       | F (2.374, 23.74) = 5.795, P=0.0065 |                                     |                                  |                                 |
| Fig. 4B left (all mice)                 | Unpaired 2-tailed t-test          | t=3.026, df=20, P=0.0067           |                                     |                                  |                                 |
| Fig. 4B middle (females)                | Unpaired 2-tailed t-test          | t=2.983, df=8, P=0.0175            |                                     |                                  |                                 |
| Fig. 4B right (males)                   | Unpaired 2-tailed t-test          | t=2.003, df=10, P=0.0730           |                                     |                                  |                                 |
| Fig. 4B<br>Female CGRP vs.<br>Male CGRP | Unpaired 2-tailed t-test          | t=3.133, df=9, P=0.0121            |                                     |                                  |                                 |
| Fig. 5A left (all mice)                 | Two-way repeated measure ANOVA    |                                    |                                     |                                  |                                 |
|                                         | Interaction factor                | F (1, 41) = 3.684, P=0.0619        |                                     |                                  |                                 |
|                                         | Treatment factor                  | F (1, 41) = 0.003699, P=0.9518     |                                     |                                  |                                 |
|                                         | Condition factor                  | F (1, 41) = 17.87, P=0.0001        |                                     |                                  |                                 |
|                                         | Paired 2-tailed t-test            | ****P < 0.0001                     |                                     |                                  |                                 |
| Fig. 5A middle (females)                | Two-way repeated measure ANOVA    |                                    |                                     |                                  |                                 |
|                                         | Interaction factor                | F (1, 20) = 8.429, P=0.0088        |                                     |                                  |                                 |
|                                         | Treatment factor                  | F (1, 20) = 0.06922, P=0.7952      |                                     |                                  |                                 |
|                                         | Condition factor                  | F (1, 20) = 9.630, P=0.0056        |                                     |                                  |                                 |
|                                         | Paired 2-tailed t-test            | ***P < .001                        |                                     |                                  |                                 |
| Fig. 5A right (males)                   | Two-way repeated measure ANOVA    |                                    |                                     |                                  |                                 |
|                                         | Interaction factor                | F (1, 19) = 0.1018, P=0.7532       |                                     |                                  |                                 |
|                                         | Treatment factor                  | F (1, 19) = 0.05351, P=0.8195      |                                     |                                  |                                 |
|                                         | Condition factor                  | F (1, 19) = 8.113, P=0.0103        |                                     |                                  |                                 |
|                                         | Paired 2-tailed t-test            | *P < .05                           |                                     |                                  |                                 |
| Fig. 5B<br>Female CGRP vs.<br>Male CGRP | Unpaired 2-tailed t-test          | t=3.170, df=24, P=0.0041           |                                     |                                  |                                 |
| Fig. 5C left (all mice)                 | Two-way repeated measure ANOVA    |                                    |                                     |                                  |                                 |

|                                                                |                                |                                   |
|----------------------------------------------------------------|--------------------------------|-----------------------------------|
|                                                                | Interaction factor             | $F(1, 41) = 0.01288, P=0.9102$    |
|                                                                | Treatment factor               | $F(1, 41) = 0.005324, P=0.9422$   |
|                                                                | Condition factor               | $F(1, 41) = 44.42, P<0.0001$      |
|                                                                | Paired 2-tailed t-test         | *** $P < .001$ , **** $P < .0001$ |
| Fig. 5C middle (females)                                       | Two-way repeated measure ANOVA |                                   |
|                                                                | Interaction factor             | $F(1, 20) = 0.1767, P=0.6787$     |
|                                                                | Treatment factor               | $F(1, 20) = 0.7693, P=0.3908$     |
|                                                                | Condition factor               | $F(1, 20) = 14.41, P=0.0011$      |
|                                                                | Paired 2-tailed t-test         | ** $P < .01$                      |
| Fig. 5C right (males)                                          | Two-way repeated measure ANOVA |                                   |
|                                                                | Interaction factor             | $F(1, 19) = 0.2071, P=0.6542$     |
|                                                                | Treatment factor               | $F(1, 19) = 1.028, P=0.3233$      |
|                                                                | Condition factor               | $F(1, 19) = 30.49, P<0.0001$      |
|                                                                | Paired 2-tailed t-test         | ** $P < .01$                      |
| Fig. 5D<br>Female CGRP vs.<br>Male CGRP                        | Unpaired 2-tailed t-test       | $t=0.4501, df=24, P=0.6567$       |
| Fig. 6A right (all mice)                                       | Two-way repeated measure ANOVA |                                   |
|                                                                | Interaction factor             | $F(1, 55) = 4.902, P=0.0310$      |
|                                                                | Treatment factor               | $F(1, 55) = 0.7006, P=0.4062$     |
|                                                                | Condition factor               | $F(1, 55) = 10.26, P=0.0023$      |
|                                                                | Paired 2-tailed t-test         | ** $P < .01$                      |
| Fig. 6B right (females)                                        | Two-way repeated measure ANOVA |                                   |
|                                                                | Interaction factor             | $F(1, 29) = 2.756, P=0.1077$      |
|                                                                | Treatment factor               | $F(1, 29) = 0.08961, P=0.7668$    |
|                                                                | Condition factor               | $F(1, 29) = 9.036, P=0.0054$      |
|                                                                | Paired 2-tailed t-test         | * $P < .05$                       |
| Fig. 6C right (males)                                          | Two-way repeated measure ANOVA |                                   |
|                                                                | Interaction factor             | $F(1, 24) = 2.309, P=0.1417$      |
|                                                                | Treatment factor               | $F(1, 24) = 0.8393, P=0.3687$     |
|                                                                | Condition factor               | $F(1, 24) = 3.282, P=0.0826$      |
| Changes in mean pixel<br>area:<br>Female CGRP vs.<br>Male CGRP | Unpaired 2-tailed t-test       | $t=0.5501, df=25, P=0.5871$       |
| Suppl. Fig. 2A                                                 | Pearson correlation            | $r=0.6290, P=0.0023$              |
| Suppl. Fig. 2B                                                 | Pearson correlation            | $r=-0.2418, P=0.5307$             |
| Suppl. Fig. 2C                                                 | Pearson correlation            | $r=-0.4113, P=0.2714$             |
| Suppl. Fig. 2D                                                 | Pearson correlation            | $r=0.6978, P=0.0170$              |
